# Supplementary material for: Highly efficient determination of Mn2+ in Chinese liquor by using a novel electrochemical sensor based on TiO2-NH2@covalent organic framework nanocomposites
Source: Royal Society of Chemistry journal article supplement (doi:10.1039/d3ay00222e), 2023-01-01
Supplement: d3ay00222e1.pdf [file d3ay00222e1.pdf]

## **Supplementary Materials**

### **Highly efficient determination of Mn<sup>2+</sup> in Chinese liquor by a novel electrochemical sensor based on TiO<sub>2</sub>-NH<sub>2</sub>@covalent organic frameworks nanocomposites**

Liangyun Yu<sup>a</sup>, Liangju Sun<sup>a</sup>, Qi Zhang<sup>b,\*</sup>, Jingjing Zhang<sup>a</sup>, Bairen Yang<sup>b</sup>, Mingquan Huang<sup>a</sup>,  
Yawen Zhou<sup>a</sup>, Baocai Xu<sup>a,\*</sup>, Xiaoya Hu<sup>c,\*</sup>

<sup>a</sup> *School of Light Industry, Beijing Technology and Business University, No. 11 Fucheng Road, Haidian District, Beijing 100048, P. R. China*

<sup>b</sup> *School of Environmental Science and Engineering, Yancheng Institute of Technology, Yancheng, 224051, P. R. China*

<sup>c</sup> *College of Chemistry and Engineering, Yangzhou University, 88 South University Avenue, Yangzhou 225002, P. R. China*

*\* Corresponding author. Tel.: +86-514-87972034.*

*E-mail address: zhqisir@163.com (Q. Zhang), xubac@163.com (B.C. Xu), xyhu@yzu.edu.cn (X.Y. Hu).*

Fig. S1(A–D) respectively demonstrates the TEM images of  $\text{TiO}_2$ ,  $\text{TiO}_2\text{-NH}_2$ ,  $\text{TiO}_2\text{-NH}_2@\text{COF}_{\text{DPTB}}$  and  $\text{COF}_{\text{DPTB}}$ . As it shown, the first three materials all exhibited the aggregation of nanoparticles, in which the aggregation degree of  $\text{TiO}_2\text{-NH}_2@\text{COF}_{\text{DPTB}}$  was significantly reduced and some pores were distributed, being consistent with the SEM characterization above.

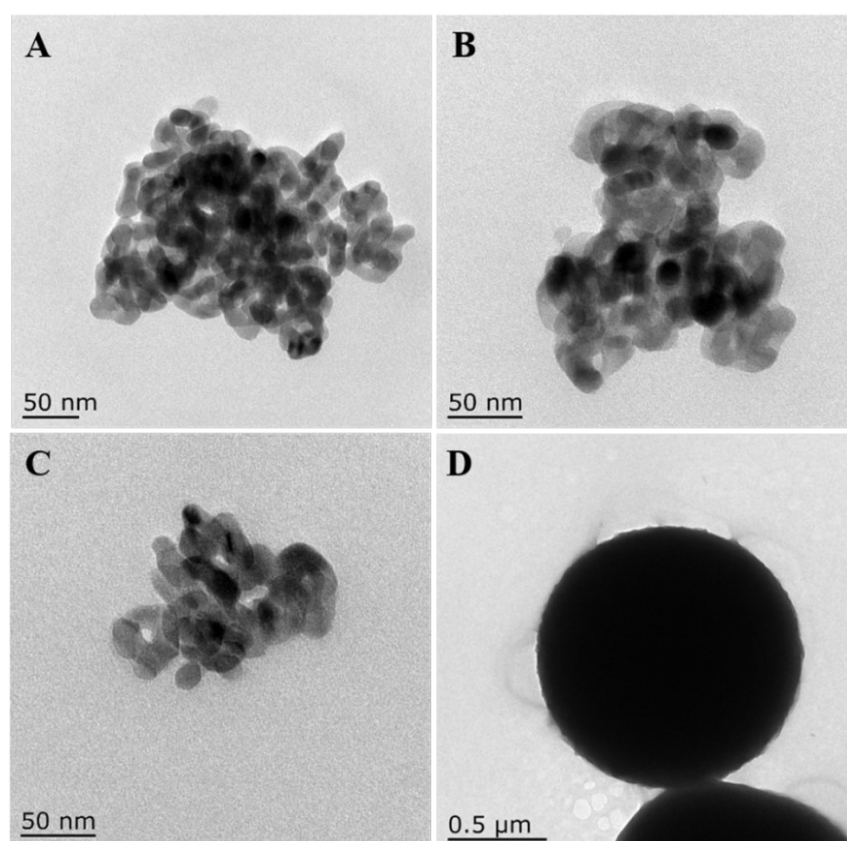

Fig. S1 TEM images of (A)  $\text{TiO}_2$ , (B)  $\text{TiO}_2\text{-NH}_2$ , (C)  $\text{TiO}_2\text{-NH}_2@\text{COF}_{\text{DPTB}}$  and (D)  $\text{COF}_{\text{DPTB}}$ .

XRD was employed for the phase and structure characterization of the nanomaterials involved. The typical XRD patterns of pure  $\text{TiO}_2$ ,  $\text{TiO}_2\text{-NH}_2$ ,  $\text{COF}_{\text{DPTB}}$ , and  $\text{TiO}_2\text{-NH}_2@\text{COF}_{\text{DPTB}}$  nanocomposites were illustrated in Fig. S2(A). In the top curve (a), the peaks located at  $2\theta=25.17^\circ$ ,  $37.69^\circ$ ,  $47.92^\circ$ ,  $53.81^\circ$ ,  $54.94^\circ$ ,  $62.53^\circ$ ,  $68.72^\circ$ ,  $70.25^\circ$  and  $74.99^\circ$  can be indexed to (101), (004), (200), (105), (211), (204),

(116), (220) and (215) of the anatase crystals of  $\text{TiO}_2$  (JCPDS card no. 21-1272) [1, 2]. After reaction with APS, the crystal structure of  $\text{TiO}_2$  remained unchanged (curve (b)). As can be seen in curve (c), the presence of characteristic diffraction peaks at  $5.63^\circ$ ,  $15.23^\circ$ ,  $29.01^\circ$ , and  $42.42^\circ$  were attributed to the crystalline  $\text{COF}_{\text{DPTB}}$ . The rest of peaks in the  $\text{TiO}_2\text{-NH}_2@ \text{COF}_{\text{DPTB}}$  (curve (d)) agreed with the simulated XRD patterns of anatase  $\text{TiO}_2$ . These results revealed that  $\text{COF}_{\text{DPTB}}$  layer has indeed been coated on  $\text{TiO}_2\text{-NH}_2$  nanoparticles. Additionally, both previous EDX (Fig. (3C)) and subsequent FTIR (Fig. S2B) analyses confirmed explicitly  $\text{COF}_{\text{DPTB}}$  existence in the composites.

To chemically bond  $\text{TiO}_2$  onto the surface of  $\text{COF}_{\text{DPTB}}$ , it was first functionalized with amino groups by APS. Then  $\text{TiO}_2\text{-NH}_2@ \text{COF}_{\text{DPTB}}$  nanocomposites were synthesized by in-situ growth of  $\text{COF}_{\text{DPTB}}$  on  $\text{TiO}_2\text{-NH}_2$  surface using DMTP and TAPB as the starting materials based on monomer mediated growth strategy. The functional groups of  $\text{TiO}_2$ ,  $\text{TiO}_2\text{-NH}_2$ ,  $\text{COF}_{\text{DPTB}}$ , DMTP, TAPB and  $\text{TiO}_2\text{-NH}_2@ \text{COF}_{\text{DPTB}}$  were further investigated by FTIR (Fig. S2B). As for pristine  $\text{TiO}_2$  (curve (a)), the large and wide FTIR peak appeared at around  $3278 \text{ cm}^{-1}$  was originated from the  $\text{-OH}$  stretching vibration on the surface, demonstrating the presence of moisture [3]. The broad band below  $1000 \text{ cm}^{-1}$  can be attributed to the vibration absorbance of  $\text{Ti-O-Ti}$ , which were almost unchanged after amination (curve (b)) [3, 4]. With amino grafting to  $\text{TiO}_2$  surface, new bands appeared in 2928, 1124 and  $1062 \text{ cm}^{-1}$ , which were ascribed to the stretching vibrations of  $\text{C-H}$ ,  $\text{C-N}$ , and  $\text{Ti-O-Si}$ , respectively [5]. Moreover, the characteristic bands at 1620 and  $1470 \text{ cm}^{-1}$  can be assigned respectively to the bending modes of  $\text{N-H}$  in  $\text{-NH}_2$  and the  $\text{C-H}$

in  $-\text{CH}_2-$  [1, 6]. So, it can be confirmed that  $-\text{NH}_2$  groups have been grafted successfully onto the surface of  $\text{TiO}_2$  by APS. Compared to the two monomers of DMTP and TAPB, the FTIR spectroscopy (curve (c)) of pure  $\text{COF}_{\text{DPTB}}$  presented a new characteristic peak at  $1615\text{ cm}^{-1}$ , corresponding to the stretching vibration of  $\text{C}=\text{N}$  [7]. Meanwhile, the peaks at  $3433$ ,  $3354$ , and  $3209\text{ cm}^{-1}$  associated with the stretching vibration of  $\text{N-H}$  in TAPB, as well as that peak at  $1679\text{ cm}^{-1}$  of the stretching vibration of  $\text{C}=\text{O}$  in DMTP all vanished [8]. Hence, these data demonstrated that amino groups condensed successfully with aldehyde groups via the Schiff-base reaction to form the imine bonds. As curve (f) shown, the emergence of  $\text{TiO}_2\text{-NH}_2$  in the  $\text{TiO}_2\text{-NH}_2@\text{COF}_{\text{DPTB}}$  nanocomposite was determined by the appearance of the vibration absorbance of  $\text{Ti-O-Si}$  at  $1053\text{ cm}^{-1}$  and the large broad peak of  $\text{Ti-O-Ti}$  below  $1000\text{ cm}^{-1}$ , while other characteristic peaks of  $\text{COF}_{\text{DPTB}}$  remain retained. In summary, FTIR spectra suggested the generation of  $\text{TiO}_2\text{-NH}_2@\text{COF}_{\text{DPTB}}$ , which was consistent with the above results.

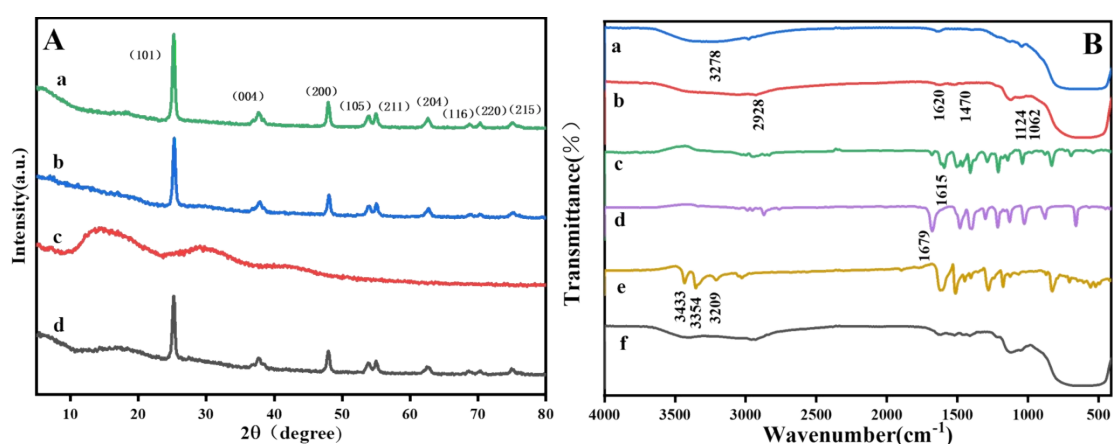

Fig. S2 (A) XRD patterns of (a)  $\text{TiO}_2$ , (b)  $\text{TiO}_2\text{-NH}_2$ , (c)  $\text{COF}_{\text{DPTB}}$ , and (d)  $\text{TiO}_2\text{-NH}_2@\text{COF}_{\text{DPTB}}$ . (B) FTIR spectra of (a)  $\text{TiO}_2$ , (b)  $\text{TiO}_2\text{-NH}_2$ , (c)  $\text{COF}_{\text{DPTB}}$ , (d) DMTP, (e) TAPB, and (f)  $\text{TiO}_2\text{-NH}_2@\text{COF}_{\text{DPTB}}$ .

### **Analytical parameters optimization**

To obtain the best detection of  $\text{Mn}^{2+}$  based on  $\text{TiO}_2\text{-NH}_2@\text{COF}_{\text{DPTB}}/\text{GCE}$ , the concentration of  $\text{TiO}_2\text{-NH}_2@\text{COF}_{\text{DPTB}}$ , the pH value of  $\text{NH}_3\text{-NH}_4\text{Cl}$  buffer, the deposition potential and deposition time, as well as the SDS concentration were optimized, and the results were shown in Fig. S3. It should be noted that, most of the time, double reduction peaks were observed during the cathodic scan, indicating that the reduction went through an intermediate state of Mn (III) [9, 10]. And with the increase of  $\text{Mn}^{2+}$  concentration ( $\geq 8.0$  nm), the bimodal was more obvious. This phenomenon had also been reported in the literature [9, 11]. Moreover, double stripping peaks are common to occur on solid electrodes because the stripping of the bulk portion of the deposited analyte occurs at a different potential than the stripping of the first monolayer on the electrode [9]. Considering the complexity of the peak shape, we used the peak area (charge) rather than the amplitude of peak height in the waveform analysis because the former was easier to quantify and had better linearity.

The concentration of  $\text{TiO}_2\text{-NH}_2@\text{COF}_{\text{DPTB}}$  in a range of  $0.6\text{--}1.8$   $\text{mg}\cdot\text{mL}^{-1}$  was optimized by SWCSV, and the result was shown in Fig. S3(A). It can be seen that the peak area increased gradually as the  $\text{TiO}_2\text{-NH}_2@\text{COF}_{\text{DPTB}}$  concentration increased. This was because as the  $\text{TiO}_2\text{-NH}_2@\text{COF}_{\text{DPTB}}$  concentration increased, that means, the composite amount on electrode surface increased, the synergistic effect and the number of binding sites increased consequently. However, when the concentration continued to increase to exceed  $1.0$   $\text{mg}\cdot\text{mL}^{-1}$ , the modification layer on the electrode surface thickened which decreased the mass transfer ability, so the peak area

decreased instead. Hence,  $1.0 \text{ mg}\cdot\text{mL}^{-1}$  was chosen as the optimum  $\text{TiO}_2\text{-NH}_2@\text{COF}_{\text{DPTB}}$  concentration in the subsequent measurements.

As shown in previous equations (1) and (2), the redox of  $\text{Mn}^{2+}$  is dependent on pH. So, to further explore the electrochemical properties of  $\text{TiO}_2\text{-NH}_2@\text{COF}_{\text{DPTB}}/\text{GCE}$ , the influence of buffer pH on the stripping signal was investigated in 0.05 M  $\text{NH}_3\text{-NH}_4\text{Cl}$  buffer. Our results showed that when pH was less than 8.0, the peak deformation was serious and the response current can't be accurately read. Moreover, the stronger the acidity, the smaller the peak current and the more severe the deformation of the peak shape. Thus, the effect of pH in the 8.5–10.5 range on the modified electrode was studied. As the results in Fig. S3(B) demonstrated, the largest peak area with good looking peak shape was obtained around pH 9.0. At higher pH values, the decrease in peak area was because of the inadequate solubility of  $\text{Mn}^{2+}$  in more basic pH for the increase of the competitive product  $\text{Mn}(\text{OH})_2$ , which can then be oxidized by dissolved  $\text{O}_2$  in the solution to precipitate  $\text{Mn}(\text{OH})_4$  [12]. It was also found that the cathodic reduction potential shifted in the more negative direction as pH increased, possibly due to the reduced proton mass transfer to the interface electrode surface/deposition [13]. Therefore, the subsequent experiments involved  $\text{NH}_3\text{-NH}_4\text{Cl}$  buffer with pH 9.0.

Next, we optimized the SWCSV step based on the fact that the pre-concentration step is critical to any stripping technique. First of all, the effect of deposition potential on the SWCSV responses was examined by varying it from 0.3–0.7 V with intervals of 0.1 V. As revealed in Fig. S3(C), the potential of 0.3 V was too negative to

maximize the oxidation of  $\text{Mn}^{2+}$ , thus the reduction peak area of  $\text{MnO}_2$  was almost zero [14]. The peak area first increased with the cathodic scanning potential continued to increase, and then decreased as it more positive than 0.5 V. In addition, the peak shape was also the best at 0.5 V deposited potential. Accordingly, 0.5 V was used as the optimum potential for production sufficient quantities of  $\text{MnO}_2$  for detection in the following experiments.

Fig. S3(D) assessed the effect of deposition time varied by 50 s from 450 to 650 s on the sensitivity to find the minimum time for sufficient sensitivity. As is shown, the peak area increased sharply with the increase of accumulation time from 450 to 550 s, and then gradually decreased after it exceeded 550 s, indicating that the deposition of manganese oxide on the electrode surface had reached saturation. Thus, the deposition time of 550 s was chosen for subsequent studies.

Surfactants are one kind of amphiphilic ions or molecules with a hydrophilic head at one end and a long hydrophobic tail at the other, and have been widely used in the field of electrochemistry and electroanalytical chemistry due to their ability to enhance and improve the electrode/solution interface properties by adsorption at the interfaces or aggregation into supramolecular structures [15]. SDS, as an anion surfactant, its negatively charged layer can adsorb positively charged  $\text{Mn}^{2+}$  to the electrode surface through electrostatic interaction, reduce the electrode reaction overvoltage and accelerate the electron transfer rate. Besides,  $\text{Mn}^{2+}$  in the solution may also form a transient adduct with SDS, which is likely to be adsorbed on the surface of electrode, making the electron transfer reaction of  $\text{Mn}^{2+}$  easier to take place.

So the anionic surfactant SDS should effectively promote the electrochemical responses of  $\text{Mn}^{2+}$ , which was proved in Fig. S3(E). It can be seen that the maximum enhancement of the current response was achieved when the SDS concentration was 1.0 mM, which was used as its application concentration in the subsequent experiments.

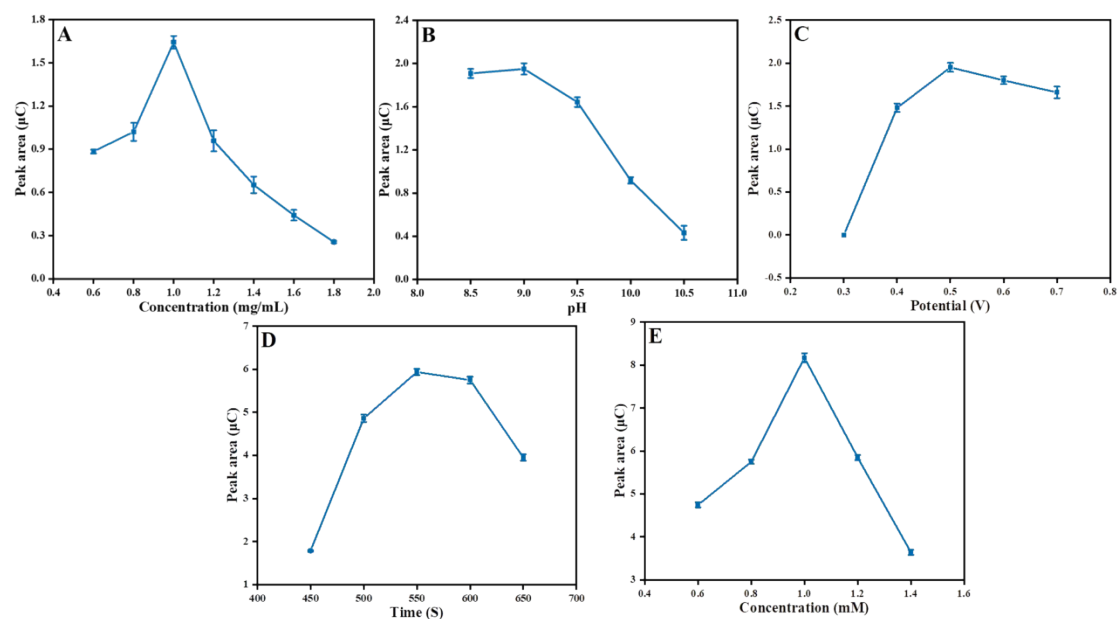

**Fig. S3** The effects of (A) the concentration of  $\text{TiO}_2\text{-NH}_2@\text{COF}_{\text{DPTB}}$ , (B) the pH value of  $\text{NH}_3\text{-NH}_4\text{Cl}$  buffer, (C) the deposition potential, (D) the deposition time, and (E) the concentration of SDS on the cathodic stripping signal. Error bars are the standard error of the mean ( $n=6$ ).

## References

- [1] M.M. Kang, M.H. Wang, S. Zhang, X.D. Dong, L.H. He, Y.H. Zhang, D.J. Guo, P.Y. Wang, S.M. Fang, Z.H. Zhang, *Electrochim. Acta*, 2015, **161**, 186-194.
- [2] Q. Zhang, L.Y. Yu, C.C. Xu, W. Zhang, M. Chen, Q. Xu, G.W. Diao, *Chem. Phys. Lett.*, 2020, **761**, 138073.
- [3] F. Vajedi, H. Dehghani, *Mater. Sci. Eng. B*, 2019, **243**, 189-198.



- [4] H.F. Zhang, S.M. Shuang, G.Z. Wang, Y.J. Guo, X.L. Tong, P. Yang, A.J. Chen, C. Dong, Y. Qin, *RSC Adv.*, 2015, **5**, 4343-4349.
- [5] K. Jiang, J. Zhang, Y.F. Wan, Z.J. Liu, J.W. Chen, *Opt. Mater.*, 2021, **114**, 110913.
- [6] F.M. Liu, Y. Zhang, W. Yin, C.J. Hou, D.Q. Huo, B. He, L.L. Qian, H.B. Fa, *Sens. Actuators B Chem.*, 2017, **242**, 889-896.
- [7] Y. Xie, T. Zhang, Y.L. Chen, Y. Wang, L. Wang, *Talanta*, 2020, **213**, 120843.
- [8] X. Sun, N. Wang, Y. Xie, H.C. Chu, Y. Wang, Y. Wang, *Talanta*, 2021, **225**, 22072.
- [9] W.J. Kang, C. Rusinek, A. Bange, E. Haynes, W.R. Heineman, I. Papautsky, *Electroanalysis*, 2017, **29**, 686-695.
- [10] S. Nijjer, J. Thonstad, G.M. Haarberg, *Electrochim. Acta*, 2000, **46**, 395-399.
- [11] E. Boselli, Z.Z. Wu, A. Friedman, B.C. Henn, I. Papautsky, *Environ. Sci. Technol.*, 2021, **55**, 7501-7509.
- [12] J.W. Di, F. Zhang, *Talanta*, 2003, **60**, 31-36.
- [13] W.J. Kang, X. Pei, A. Bange, E.N. Haynes, W.R. Heineman, I. Papautsky, *Anal. Chem.*, 2014, **86**, 12070-12077.
- [14] P.P. Xie, X.X. Chen, F. Wang, C.G. Hu, S.S. Hu, *Colloids Surf., B*, 2006, **48**, 17-23.
